# Supplementary material for: Vanadate complexes in serum: a speciation modeling study
Source: Royal Society of Chemistry journal article supplement (doi:10.1039/b914849c), 2009-11-05
Supplement: b914849c.pdf [file b914849c.pdf]

**Supplementary Information to**

**Vanadate complexes in serum: a speciation modeling study<sup>†</sup>**

Tamás Jakusch,<sup>a</sup> Annalisa Dean,<sup>b</sup> Tamás Oncsik,<sup>a</sup> Attila Csaba Bényei,<sup>c</sup> Valerio Di Marco,<sup>b</sup> and Tamás Kiss<sup>a\*</sup>

---

<sup>a</sup> Department of Inorganic and Analytical Chemistry, University of Szeged, P.O. Box 440, Szeged, H-6701, Hungary. Fax: 36 62 420505; Tel: 36 62 544337; E-mail: tkiss@chem.u-szeged.hu

<sup>b</sup> Department of Chemical Sciences, University of Padua, via Marzolo 1, 35131, Padua, Italy. Fax: 39 0498275175; Tel: 39 0498275219; E-mail: valerio.dimarco@unipd.it

<sup>c</sup> Institute of Chemistry, Laboratory for X-ray Diffraction, University of Debrecen, 1 Egyetem tér, Debrecen, H-4032, Hungary. Tel: 52-512900 Ext. 22486 Fax: (36) 52-512915; E-mail: abenyei@delfin.unideb.hu

## 1. UV-Vis spectra

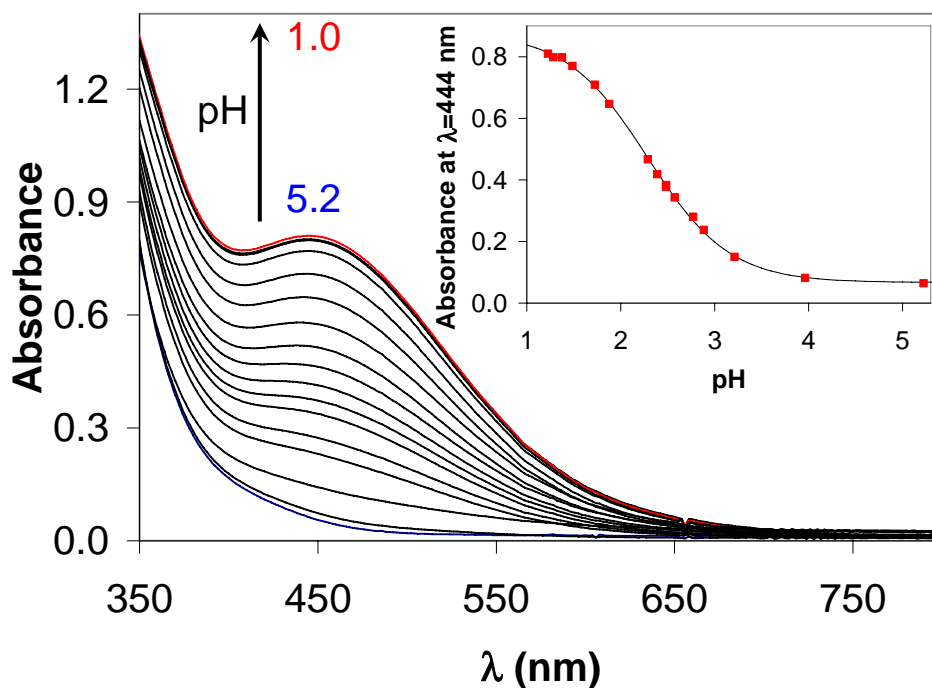

**ESI Fig. S1** UV-VIS spectra over the pH range in the hpno-vanadate system at metal to ligand ratio of 1:20;  $c_{\text{V}} = 5.0 \cdot 10^{-3} \text{ mol} \cdot \text{dm}^{-3}$ ,  $I = 0.20 \text{ mol} \cdot \text{dm}^{-3}$  KCl,  $T = 25 \text{ }^\circ\text{C}$ ,  $l = 1 \text{ cm}$ . Each sample prepared individually. In the inserted graph the absorbance is depicted versus pH which measured at  $\lambda = 444 \text{ nm}$  (at the wavelength of the absorption maximum). The ■ represent the measured points, the full line is the fitted curve.

## 2. Speciations

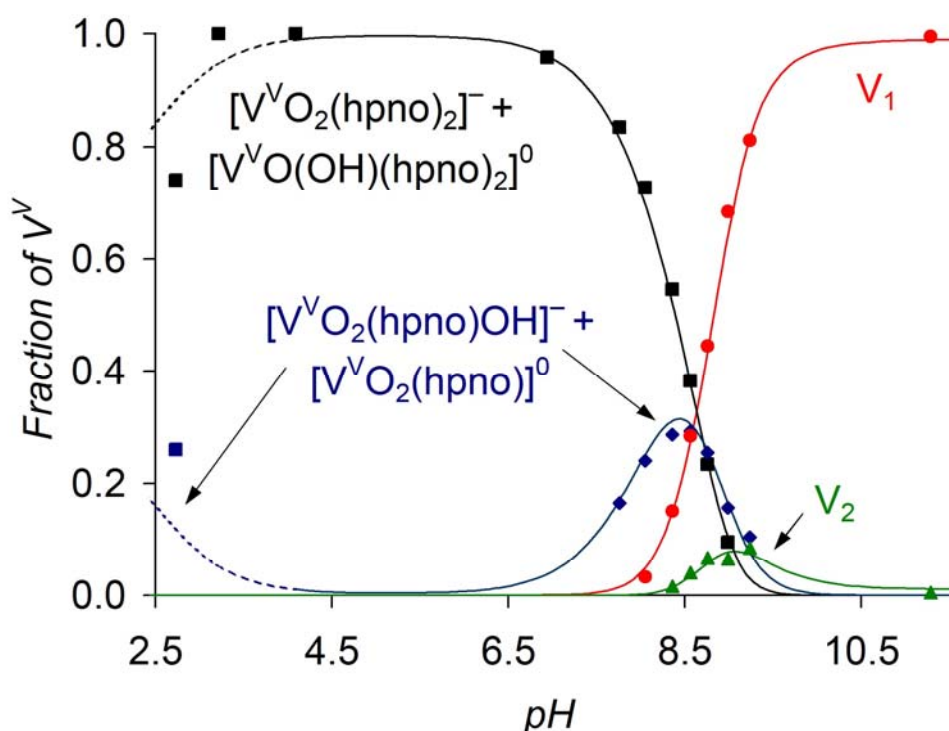

**ESI Fig. S2** Speciation curves of the complexes formed in the  $V^V$ -hpno system at a metal-to-ligand ratio of 1:3.  $c_{V^V} = 3.0 \cdot 10^{-3} \text{ mol} \cdot \text{dm}^{-3}$ ,  $I = 0.20 \text{ mol} \cdot \text{dm}^{-3} \text{ KCl}$ ,  $T = 25 \text{ }^\circ\text{C}$ . Full lines are calculated curves, symbols represent experimental points based on  $^{51}\text{V}$ -NMR spectra. ■ represents  $[\text{VO}_2(\text{hpno})_2]^-$  and  $[\text{VO}_2\text{H}(\text{hpno})_2]^0$  ● represents  $V_1$  ( $\text{VO}^{2+}$ ,  $\text{H}_2\text{VO}_4^-$  and  $\text{HVO}_4^{2-}$  together) ▲ represents  $V_2$  ( $\text{V}_2\text{O}_7^{4-}$ ,  $\text{HV}_2\text{O}_7^{3-}$  and  $\text{H}_2\text{V}_2\text{O}_7^{2-}$  together) ◆/■ represent  $[\text{VO}_2(\text{hpno})\text{OH}]^-$  and  $[\text{VO}_2(\text{hpno})]^0$  together. The most acidic sample represented by ■, contained precipitation.

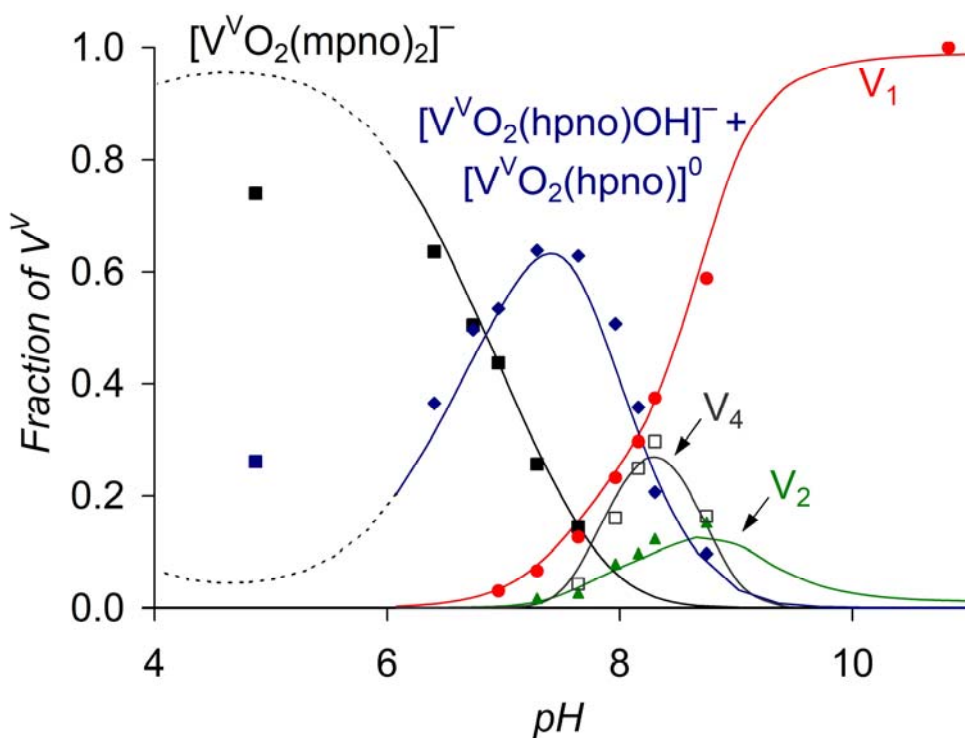

**ESI Fig. S3** Speciation curves of the complexes formed in the  $V^V$ -mpno system at a metal-to-ligand ratio of 1:3.  $c_{V^V} = 3.0 \cdot 10^{-3} \text{ mol} \cdot \text{dm}^{-3}$ ,  $I = 0.20 \text{ mol} \cdot \text{dm}^{-3} \text{ KCl}$ ,  $T = 25 \text{ }^\circ\text{C}$ . Full lines are calculated curves, symbols represent experimental points based on  $^{51}\text{V}$ -NMR spectra. ■ represents  $[\text{VO}_2(\text{mpno})_2]^-$ ; ● represents  $V_1$  ( $\text{VO}^{2+}$ ,

$\text{H}_2\text{VO}_4^-$  and  $\text{HVO}_4^{2-}$  together);  $\blacktriangle$  represents  $\text{V}_2$  ( $\text{V}_2\text{O}_7^{4-}$ ,  $\text{HV}_2\text{O}_7^{3-}$  and  $\text{H}_2\text{V}_2\text{O}_7^{2-}$  together);  $\square$  represents  $\text{V}_4$  ( $\text{V}_4\text{O}_{13}^{6-}$ ,  $\text{HV}_4\text{O}_{13}^{5-}$  and  $\text{V}_4\text{O}_{12}^{4-}$  together);  $\blacklozenge/\blacksquare$  represent  $[\text{VO}_2(\text{mpno})\text{OH}]^-$  and  $[\text{VO}_2(\text{mpno})]^0$  together. The most acidic sample represented by  $\blacksquare$ , contained precipitation.

### 3. $^{51}\text{V}$ -NMR spectra

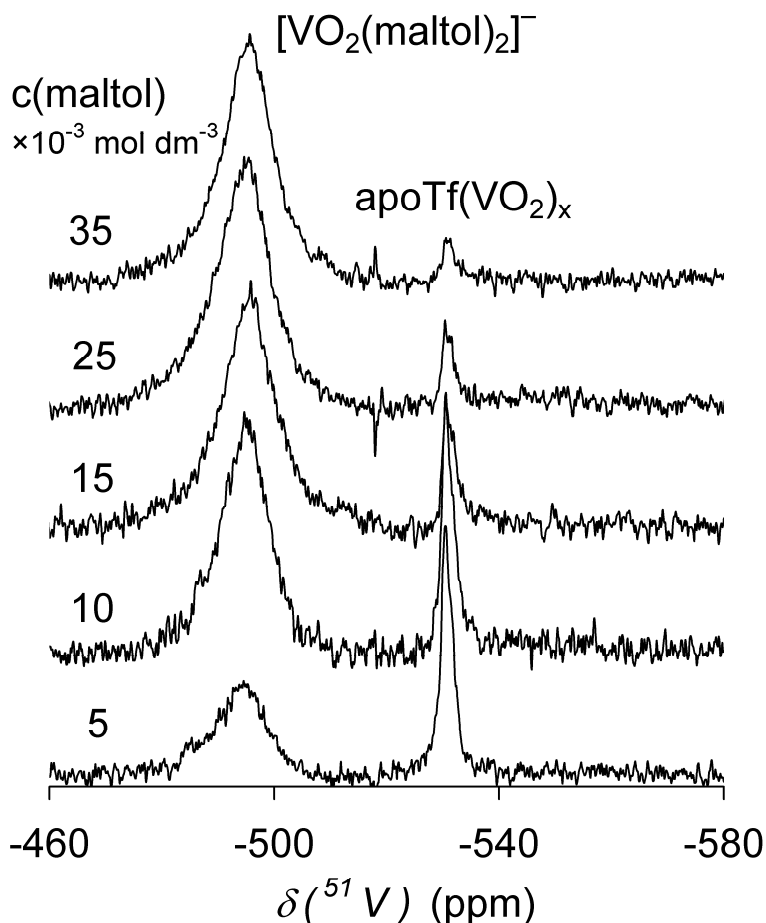

**ESI Fig. S4**  $^{51}\text{V}$ -NMR-spectra over the maltol concentration range in the vanadate-apoTf system ( $c(\text{V}) = 1.2 \cdot 10^{-3} \text{ mol} \cdot \text{dm}^{-3}$ ,  $c(\text{apoTf}) = 8.0 \cdot 10^{-4} \text{ mol} \cdot \text{dm}^{-3}$ , in  $0.20 \text{ mol} \cdot \text{dm}^{-3}$  HEPES buffer,  $\text{pH} = 7.4$ ,  $T = 25.0 \text{ }^\circ\text{C}$ )

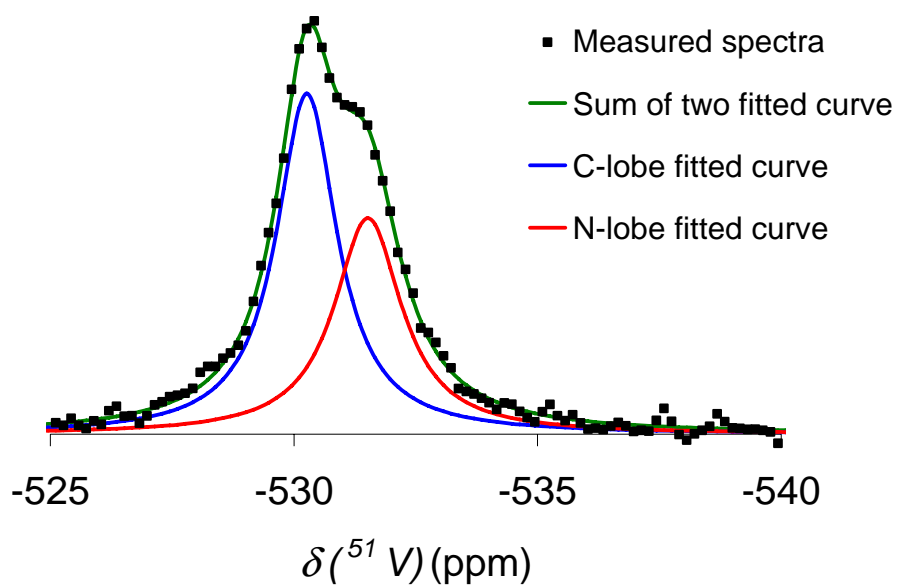

**ESI Fig. S5** Deconvolution of the  $^{51}\text{V}$ -NMR spectra of  $\text{V}^{\text{V}}$ -apoTf complexes using Lorentzian curves. ( $c_{\text{V}^{\text{V}}} = 1.2 \cdot 10^{-3} \text{ mol} \cdot \text{dm}^{-3}$ ,  $c_{\text{apoTf}} = 7.7 \cdot 10^{-4} \text{ mol} \cdot \text{dm}^{-3}$ , in  $0.20 \text{ mol} \cdot \text{dm}^{-3}$  HEPES buffer, pH = 7.4, T = 25.0 °C)

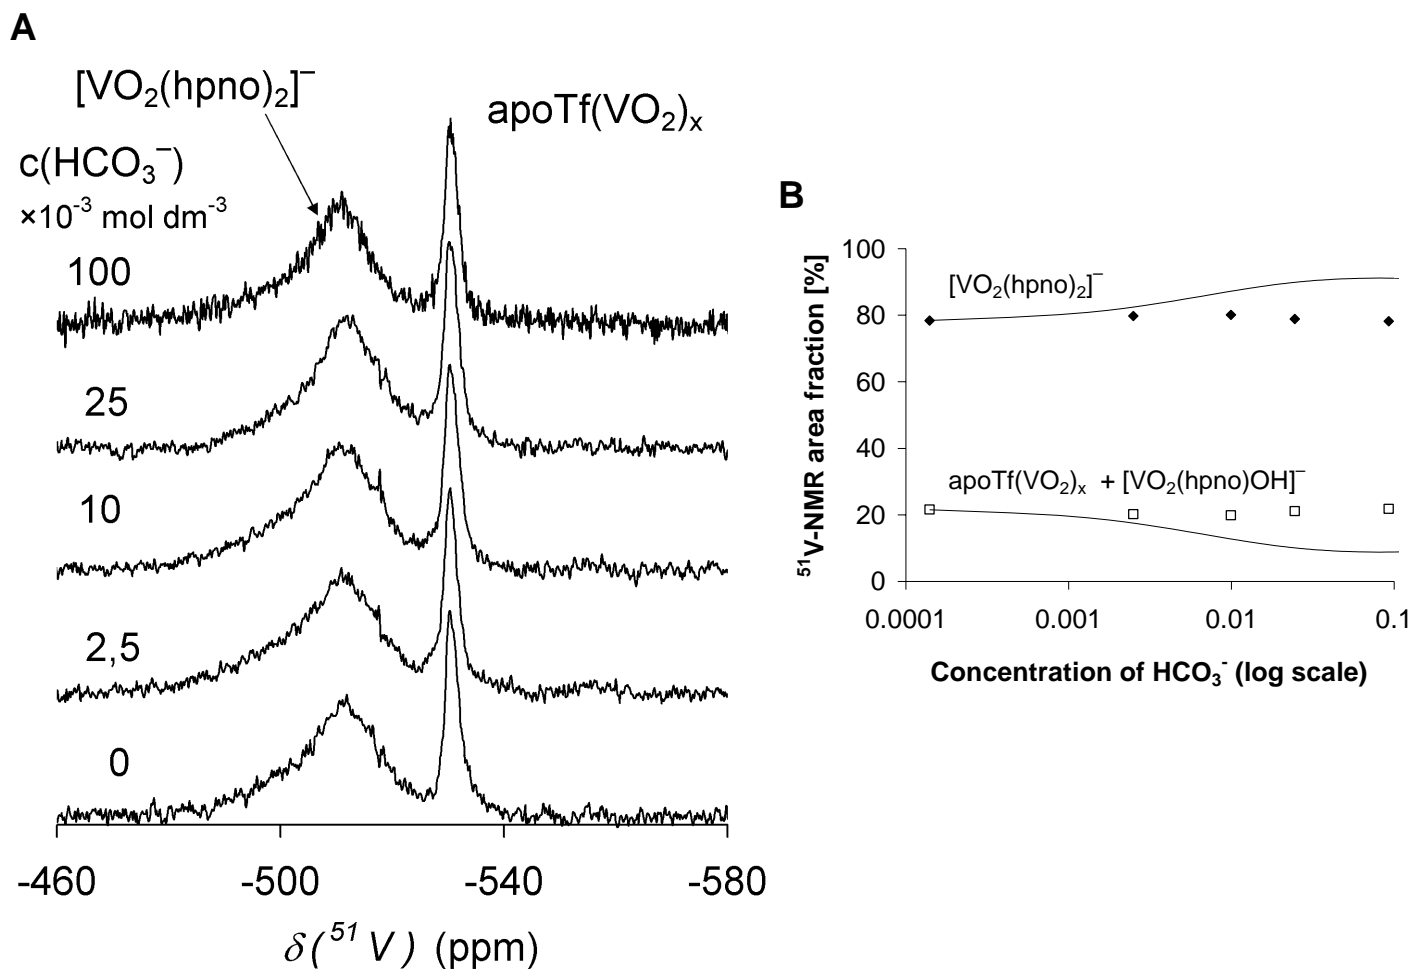

**ESI Fig. S6** **A**  $^{51}\text{V-NMR}$ -spectra over the  $\text{HCO}_3^-$  concentration range in vanadate-apoTf-hpno system **B**  $^{51}\text{V-NMR}$  area fraction in the function of carbonate concentration. The symbols represents measured points ( $\blacklozenge$ :  $[\text{VO}_2(\text{hpno})_2]^-$   $\square$ :  $\text{apoTf}(\text{VO}_2)_x + [\text{VO}_2(\text{hpno})\text{OH}]^-$ ), the solid lines were calculated supposing the existence of carbonate competition. ( $\log K_1 = 2.66$  and  $\log K_2 = 1.8$  for  $\text{HCO}_3^{2-}$ -apoTf; taken from W. R. Harris, *Biochem.*, 1985, **24**, 7412.) ( $c_{\text{V}^{\circ}} = 1.0 \cdot 10^{-3} \cdot \text{mol} \cdot \text{dm}^{-3}$ ,  $c_{\text{apoTf}} = 8.0 \cdot 10^{-4} \cdot \text{mol} \cdot \text{dm}^{-3}$ ,  $c_{\text{hpno}} = 5.5 \cdot 10^{-3} \cdot \text{mol} \cdot \text{dm}^{-3}$  in  $0.20 \text{ mol} \cdot \text{dm}^{-3}$  HEPES buffer,  $\text{pH} = 7.4$ ,  $T = 25.0 \text{ }^\circ\text{C}$ )

#### 4. Tables of stability constants

**ESI Table S1** Stability constants ( $\log \beta$ ) of vanadates ( $H^+/V^V$ ); data refer to various  $V^V$  components,  $VO_2^+$ ,  $H_2VO_4^-$  and  $HVO_4^{2-}$ . The data can be recalculated from each other, for calculation details see M.T. Beck and I. Nagypál, Chemistry of Complex Equilibria, Akadémiai Kiadó, Budapest, Hungary, 1990. Original data ( $H_2VO_4^-$ ) are taken from K. Elvingson, A. González Baró, and L. Pettersson, *Inorg. Chem.* 1996, **35**, 3388.

|                        | $H^+$    | $VO_2^+$ | $\log \beta$ | $H^+$    | $H_2VO_4^-$ | $\log \beta$ | $H^+$    | $HVO_4^{2-}$ | $\log \beta$ |
|------------------------|----------|----------|--------------|----------|-------------|--------------|----------|--------------|--------------|
| $VO_2^+$               | <b>0</b> | <b>1</b> | <b>0</b>     | 2        | 1           | 7.00         | 3        | 1            | 15.17        |
| $H_2VO_4^-$            | -2       | 1        | -7.00        | <b>0</b> | <b>1</b>    | <b>0</b>     | 1        | 1            | 8.17         |
| $HVO_4^{2-}$           | -3       | 1        | -15.17       | -1       | 1           | -8.17        | <b>0</b> | <b>1</b>     | <b>0</b>     |
| $V_2O_7^{4-}$          | -6       | 2        | -30.19       | -2       | 2           | -16.19       | 0        | 2            | 0.15         |
| $HV_2O_7^{3-}$         | -5       | 2        | -19.85       | -1       | 2           | -5.85        | 1        | 2            | 10.49        |
| $H_2V_2O_7^{2-}$       | -4       | 2        | -11.35       | 0        | 2           | 2.65         | 2        | 2            | 18.99        |
| $V_4O_{13}^{6-}$       | -10      | 4        | -37.98       | -2       | 4           | -9.98        | 2        | 4            | 22.70        |
| $HV_4O_{13}^{5-}$      | -9       | 4        | -28.63       | -1       | 4           | -0.63        | 3        | 4            | 32.05        |
| $V_4O_{12}^{4-}$       | -8       | 4        | -18.76       | 0        | 4           | 9.24         | 4        | 4            | 41.92        |
| $V_5O_{15}^{5-}$       | -10      | 5        | -23.83       | 0        | 5           | 11.17        | 5        | 5            | 52.02        |
| $V_{10}O_{28}^{6-}$    | -16      | 10       | -19.72       | 4        | 10          | 50.28        | 14       | 10           | 131.98       |
| $HV_{10}O_{28}^{5-}$   | -15      | 10       | -13.10       | 5        | 10          | 56.90        | 15       | 10           | 138.60       |
| $H_2V_{10}O_{28}^{4-}$ | -14      | 10       | -8.93        | 6        | 10          | 61.07        | 16       | 10           | 142.77       |
| $H_3V_{10}O_{28}^{3-}$ | -13      | 10       | -7.07        | 7        | 10          | 62.93        | 17       | 10           | 144.63       |

**ESI Table S2** Stability constants ( $\log \beta$ ) of  $V^V$  complexes [ $H^+/V^V/L$ ; L: hpno<sup>-</sup>, mpno<sup>-</sup>, maltol<sup>-</sup>, dhp<sup>-</sup> and pic<sup>-</sup>]. Data refer to different  $V^V$  component. **A:**  $VO_2^+$  **B:**  $H_2VO_4^-$  **C:**  $HVO_4^{2-}$

**A**

|                      | $H^+$ | $VO_2^+$ | L | hpno  | mpno  | maltol <sup>a</sup> | dhp <sup>b</sup> | pic <sup>c</sup> |
|----------------------|-------|----------|---|-------|-------|---------------------|------------------|------------------|
| $[VO_2L(OH)_2]^{2-}$ | -2    | 1        | 1 | -     | -     | -5.93               | -                | -                |
| $[VO_2L(OH)]^-$      | -1    | 1        | 1 | 4.39  | 3.59  | 4.10                | 6.56             | 2.41             |
| $[VO_2L]^0$          | 0     | 1        | 1 | 8.93  | 8.52  | -                   | 12.44            | 7.06             |
| $[VO_2L_2]^-$        | 0     | 1        | 2 | 15.30 | 12.92 | 16.89               | 19.36            | 12.20            |
| $[VO_2HL_2]^0$       | 1     | 1        | 2 | 17.44 | -     | -                   | 24.98            | -                |
| $[VOL_2]^+$          | 2     | 1        | 2 | -     | -     | -                   | 27.88            | -                |

**B**

|                      | $H^+$ | $H_2VO_4^-$ | L | Hpno  | mpno  | maltol <sup>a</sup> | dhp <sup>b</sup> | pic <sup>c</sup> |
|----------------------|-------|-------------|---|-------|-------|---------------------|------------------|------------------|
| $[VO_2L(OH)_2]^{2-}$ | 0     | 1           | 1 | -     | -     | 1.07                | -                | -                |
| $[VO_2L(OH)]^-$      | 1     | 1           | 1 | 11.39 | 10.59 | 11.10               | 13.73            | 9.41             |
| $[VO_2L]^0$          | 2     | 1           | 1 | 15.93 | 15.52 | -                   | 19.61            | 14.06            |
| $[VO_2L_2]^-$        | 2     | 1           | 2 | 22.30 | 19.92 | 23.89               | 26.53            | 19.20            |
| $[VO_2HL_2]^0$       | 3     | 1           | 2 | 24.44 | -     | -                   | 32.15            | -                |
| $[VOL_2]^+$          | 4     | 1           | 2 | -     | -     | -                   | 35.05            | -                |

**C**

|                      | $H^+$ | $HVO_4^{2-}$ | L | hpno  | mpno  | maltol <sup>a</sup> | dhp <sup>b</sup> | pic <sup>c</sup> |
|----------------------|-------|--------------|---|-------|-------|---------------------|------------------|------------------|
| $[VO_2L(OH)_2]^{2-}$ | 1     | 1            | 1 | -     | -     | 9.24                | -                | -                |
| $[VO_2L(OH)]^-$      | 2     | 1            | 1 | 19.56 | 18.76 | 19.27               | 21.96            | 17.58            |
| $[VO_2L]^0$          | 3     | 1            | 1 | 24.10 | 23.69 | -                   | 27.84            | 22.23            |
| $[VO_2L_2]^-$        | 3     | 1            | 2 | 30.47 | 28.09 | 32.06               | 34.76            | 27.37            |
| $[VO_2HL_2]^0$       | 4     | 1            | 2 | 32.61 | -     | -                   | 40.38            | -                |
| $[VOL_2]^+$          | 5     | 1            | 2 | -     | -     | -                   | 43.28            | -                |

<sup>a</sup> K. Elvingson, A. González Baró, and L. Pettersson, *Inorg. Chem.* 1996, **35**, 3388.

Electronic Supplementary Information for Dalton Transactions  
This journal is © The Royal Society of Chemistry 2009

<sup>b</sup> M. M. C. A. Castro, F. Avecilla, C. F. G. C. Geraldés, B. de Castro and M. Rangel, *Inorg. Chim. Acta*, 2003, **356**, 142-154

<sup>c</sup> I. Andersson, András Gorzsás and L. Pettersson, *Dalton Trans.*, 2004, 421.



**ESI Table S3** Conditional stability constants ( $\log K$  and  $\log \beta$ ) of vanadate complexes [V<sup>V</sup>/apoTf]. Data refer to different V<sup>V</sup> component. V<sub>1</sub> symbolize VO<sub>2</sub><sup>+</sup>, H<sub>2</sub>VO<sub>4</sub><sup>-</sup> and HVO<sub>4</sub><sup>2-</sup> together.

|                | V <sub>1</sub> | VO <sub>2</sub> <sup>+</sup> | H <sub>2</sub> VO <sub>4</sub> <sup>-</sup> | HVO <sub>4</sub> <sup>2-</sup> |
|----------------|----------------|------------------------------|---------------------------------------------|--------------------------------|
| $\log K_1$     | 6.03           | 13.90                        | 6.10                                        | 6.87                           |
| $\log K_2$     | 5.46           | 13.33                        | 5.53                                        | 6.30                           |
| $\log \beta_2$ | 11.49          | 27.23                        | 11.63                                       | 13.17                          |

**ESI Table S4** Component matrix and stability constants (data refer to  $\text{H}_2\text{VO}_4^-$ ) used for serum speciation calculation.

| $\text{H}^+$ | $\text{H}_2\text{VO}_4^-$ | $\text{H}_2\text{PO}_4^-$ | lact | cit | gly | his | apoTf | HSA | maltol | hpno | Fe(III) | Ref        | $\log \beta$ |
|--------------|---------------------------|---------------------------|------|-----|-----|-----|-------|-----|--------|------|---------|------------|--------------|
| -1           | 1                         | 0                         | 0    | 0   | 0   | 0   | 0     | 0   | 0      | 0    | 0       | a          | -8.17        |
| -2           | 2                         | 0                         | 0    | 0   | 0   | 0   | 0     | 0   | 0      | 0    | 0       | a          | -16.19       |
| -1           | 2                         | 0                         | 0    | 0   | 0   | 0   | 0     | 0   | 0      | 0    | 0       | a          | -5.85        |
| 0            | 2                         | 0                         | 0    | 0   | 0   | 0   | 0     | 0   | 0      | 0    | 0       | a          | 2.65         |
| -2           | 4                         | 0                         | 0    | 0   | 0   | 0   | 0     | 0   | 0      | 0    | 0       | a          | -9.98        |
| -1           | 4                         | 0                         | 0    | 0   | 0   | 0   | 0     | 0   | 0      | 0    | 0       | a          | -0.63        |
| 0            | 4                         | 0                         | 0    | 0   | 0   | 0   | 0     | 0   | 0      | 0    | 0       | a          | 9.24         |
| 0            | 5                         | 0                         | 0    | 0   | 0   | 0   | 0     | 0   | 0      | 0    | 0       | a          | 11.17        |
| 4            | 10                        | 0                         | 0    | 0   | 0   | 0   | 0     | 0   | 0      | 0    | 0       | a          | 50.28        |
| 5            | 10                        | 0                         | 0    | 0   | 0   | 0   | 0     | 0   | 0      | 0    | 0       | a          | 56.9         |
| 6            | 10                        | 0                         | 0    | 0   | 0   | 0   | 0     | 0   | 0      | 0    | 0       | a          | 61.07        |
| 7            | 10                        | 0                         | 0    | 0   | 0   | 0   | 0     | 0   | 0      | 0    | 0       | a          | 62.93        |
| 2            | 1                         | 0                         | 0    | 0   | 0   | 0   | 0     | 0   | 0      | 0    | 0       | a          | 7.00         |
| -2           | 0                         | 1                         | 0    | 0   | 0   | 0   | 0     | 0   | 0      | 0    | 0       | b          | -18.27       |
| -1           | 0                         | 1                         | 0    | 0   | 0   | 0   | 0     | 0   | 0      | 0    | 0       | b          | -6.69        |
| 1            | 0                         | 1                         | 0    | 0   | 0   | 0   | 0     | 0   | 0      | 0    | 0       | b          | 1.85         |
| 9            | 14                        | 1                         | 0    | 0   | 0   | 0   | 0     | 0   | 0      | 0    | 0       | b          | 89.39        |
| 10           | 14                        | 1                         | 0    | 0   | 0   | 0   | 0     | 0   | 0      | 0    | 0       | b          | 93.93        |
| 11           | 14                        | 1                         | 0    | 0   | 0   | 0   | 0     | 0   | 0      | 0    | 0       | b          | 96.03        |
| -1           | 1                         | 1                         | 0    | 0   | 0   | 0   | 0     | 0   | 0      | 0    | 0       | b          | -5.68        |
| 0            | 1                         | 1                         | 0    | 0   | 0   | 0   | 0     | 0   | 0      | 0    | 0       | b          | 1.51         |
| 1            | 1                         | 1                         | 0    | 0   | 0   | 0   | 0     | 0   | 0      | 0    | 0       | b          | 5.33         |
| 2            | 1                         | 1                         | 0    | 0   | 0   | 0   | 0     | 0   | 0      | 0    | 0       | b          | 8.37         |
| -1           | 1                         | 2                         | 0    | 0   | 0   | 0   | 0     | 0   | 0      | 0    | 0       | b          | -3.9         |
| 0            | 1                         | 2                         | 0    | 0   | 0   | 0   | 0     | 0   | 0      | 0    | 0       | b          | 2.4          |
| 1            | 0                         | 0                         | 1    | 0   | 0   | 0   | 0     | 0   | 0      | 0    | 0       | c          | 3.65         |
| 2            | 2                         | 0                         | 2    | 0   | 0   | 0   | 0     | 0   | 0      | 0    | 0       | c          | 19.68        |
| 3            | 2                         | 0                         | 2    | 0   | 0   | 0   | 0     | 0   | 0      | 0    | 0       | c          | 21.61        |
| 2            | 3                         | 0                         | 2    | 0   | 0   | 0   | 0     | 0   | 0      | 0    | 0       | c          | 22.58        |
| 2            | 4                         | 0                         | 2    | 0   | 0   | 0   | 0     | 0   | 0      | 0    | 0       | c          | 24.59        |
| 0            | 1                         | 0                         | 1    | 0   | 0   | 0   | 0     | 0   | 0      | 0    | 0       | c          | 0.88         |
| 1            | 1                         | 0                         | 1    | 0   | 0   | 0   | 0     | 0   | 0      | 0    | 0       | c          | 6.92         |
| 2            | 1                         | 0                         | 1    | 0   | 0   | 0   | 0     | 0   | 0      | 0    | 0       | c          | 10.65        |
| 1            | 0                         | 0                         | 0    | 1   | 0   | 0   | 0     | 0   | 0      | 0    | 0       | d          | 5.61         |
| 2            | 0                         | 0                         | 0    | 1   | 0   | 0   | 0     | 0   | 0      | 0    | 0       | d          | 9.95         |
| 3            | 0                         | 0                         | 0    | 1   | 0   | 0   | 0     | 0   | 0      | 0    | 0       | d          | 12.89        |
| 2            | 1                         | 0                         | 0    | 1   | 0   | 0   | 0     | 0   | 0      | 0    | 0       | d          | 14.19        |
| 3            | 1                         | 0                         | 0    | 1   | 0   | 0   | 0     | 0   | 0      | 0    | 0       | d          | 18.25        |
| 1            | 2                         | 0                         | 0    | 1   | 0   | 0   | 0     | 0   | 0      | 0    | 0       | d          | 12.58        |
| 2            | 2                         | 0                         | 0    | 1   | 0   | 0   | 0     | 0   | 0      | 0    | 0       | d          | 20.06        |
| 3            | 2                         | 0                         | 0    | 1   | 0   | 0   | 0     | 0   | 0      | 0    | 0       | d          | 25.16        |
| 6            | 2                         | 0                         | 0    | 2   | 0   | 0   | 0     | 0   | 0      | 0    | 0       | d          | 40.69        |
| 0            | 1                         | 0                         | 0    | 0   | 1   | 0   | 0     | 0   | 0      | 0    | 0       | e          | 1.92         |
| 0            | 1                         | 0                         | 0    | 0   | 0   | 1   | 0     | 0   | 0      | 0    | 0       | f          | 1.72         |
| 0            | 1                         | 0                         | 0    | 0   | 0   | 0   | 1     | 0   | 0      | 0    | 0       | this work. | 6.1          |
| 0            | 2                         | 0                         | 0    | 0   | 0   | 0   | 1     | 0   | 0      | 0    | 0       | this work. | 11.63        |
| 0            | 1                         | 0                         | 0    | 0   | 0   | 0   | 0     | 1   | 0      | 0    | 0       | g          | 1.87         |
| 1            | 0                         | 0                         | 0    | 0   | 0   | 0   | 0     | 0   | 1      | 0    | 0       | a          | 8.44         |
| 2            | 1                         | 0                         | 0    | 0   | 0   | 0   | 0     | 0   | 2      | 0    | 0       | a          | 23.89        |
| 1            | 1                         | 0                         | 0    | 0   | 0   | 0   | 0     | 0   | 1      | 0    | 0       | a          | 11.10        |
| 0            | 1                         | 0                         | 0    | 0   | 0   | 0   | 0     | 0   | 1      | 0    | 0       | a          | 1.07         |
| 1            | 0                         | 0                         | 0    | 0   | 0   | 0   | 0     | 0   | 0      | 1    | 0       | this work. | 5.77         |
| 1            | 1                         | 0                         | 0    | 0   | 0   | 0   | 0     | 0   | 0      | 1    | 0       | this work. | 11.39        |
| 2            | 1                         | 0                         | 0    | 0   | 0   | 0   | 0     | 0   | 0      | 1    | 0       | this work. | 15.93        |
| 2            | 1                         | 0                         | 0    | 0   | 0   | 0   | 0     | 0   | 0      | 2    | 0       | this work. | 22.30        |
| 3            | 1                         | 0                         | 0    | 0   | 0   | 0   | 0     | 0   | 0      | 2    | 0       | this work. | 24.44        |
| 0            | 0                         | 0                         | 0    | 0   | 0   | 0   | 1     | 0   | 0      | 0    | 1       | h          | 23.54        |
| 0            | 0                         | 0                         | 0    | 0   | 0   | 0   | 1     | 0   | 0      | 0    | 2       | h          | 46.08        |
| 0            | 0                         | 0                         | 0    | 0   | 0   | 0   | 0     | 0   | 0      | 1    | 1       | i          | 10.53        |
| 0            | 0                         | 0                         | 0    | 0   | 0   | 0   | 0     | 0   | 0      | 2    | 1       | i          | 19.95        |
| 0            | 0                         | 0                         | 0    | 0   | 0   | 0   | 0     | 0   | 0      | 3    | 1       | i          | 26.97        |
| 0            | 0                         | 0                         | 0    | 0   | 0   | 0   | 0     | 0   | 1      | 0    | 1       | j          | 11.50        |
| 0            | 0                         | 0                         | 0    | 0   | 0   | 0   | 0     | 0   | 2      | 0    | 1       | j          | 21.40        |
| 0            | 0                         | 0                         | 0    | 0   | 0   | 0   | 0     | 0   | 3      | 0    | 1       | j          | 29.7         |

<sup>a</sup> K. Elvingson, A. González Baró, and L. Pettersson, *Inorg. Chem.* 1996, **35**, 3388. <sup>b</sup> I. Andersson, A. Gorzsás, C. Kerezi, I. Tóth and L. Pettersson, *Dalton Trans.*, 2005, 3658. <sup>c</sup> A. Gorzsás, I. Andersson and L. Pettersson *Dalton Trans.*, 2003, 2503. <sup>d</sup> A. Gorzsás, K. Getty, I. Andersson and L. Pettersson *Dalton Trans.*, 2004, 2873. <sup>e</sup> D. C. Crans, R. L. Bunch and L. A. Theisen, *J. Am. Chem. Soc.* 1989, **111**, 7597. <sup>f</sup> M. Fritzsche, V. Vergopoulos, D. Rehder, *Inorg. Chim. Acta* 1993, **211**, 11. <sup>g</sup> Calculated based on G. Heinemann, B. Fichtl, M. Mentler, W. Vogt, *J. Inorg. Biochem.* 2002, **90**, 38. <sup>h</sup> Calculated based on H. Sun, M. C. Cox, H. Li and P. J. Sadler, *Struct. Bonding*, 1997, **88**, 71. <sup>i</sup> Y. Li, A. Martell, *Inorg. Chim. Acta*, 1993, **214**, 103. <sup>j</sup> A. Stefanovic, J. Havel, L. Sommer, *Collec. Czech. Chem. Commun.*, 1968, **33**, 4198.

## 5. Crystallographic data

### Computing details

Data collection: MACH3/PC (Enraf Nonius, 1996); cell refinement: MACH3/PC (Enraf Nonius, 1996); data reduction: PROFIT (Streltsov & Zavodnik, 1989); program(s) used to solve structure: SHELXS97 (Sheldrick, 1990); program(s) used to refine structure: SHELXL97 (Sheldrick, 1997); molecular graphics: ORTEP-3 for Windows (Farrugia, 1997); software used to prepare material for publication: WinGX publication routines (Farrugia, 1999).

### (VO<sub>2</sub>(hpno)<sub>2</sub>·NH<sub>4</sub>·3H<sub>2</sub>O)

#### Crystal data

C<sub>10</sub>H<sub>18</sub>N<sub>3</sub>O<sub>9</sub>V<sub>1</sub>

*M<sub>r</sub>* = 375.21

Monoclinic, C2/c

Hall symbol: -C 2yc

*a* = 16.1650 (19) Å

*b* = 9.6283 (9) Å

*c* = 11.8184 (17) Å

β = 121.333 (9)°

*V* = 1571.2 (3) Å<sup>3</sup>

*Z* = 4

*F*<sub>000</sub> = 776

*D<sub>x</sub>* = 1.586 Mg m<sup>-3</sup>

Mo *K*α radiation, λ = 0.71073 Å

Cell parameters from 25 reflections

θ = 9.1–15.5°

μ = 0.68 mm<sup>-1</sup>

*T* = 293 K

Prism, orange

0.35 × 0.3 × 0.25 mm

#### Data collection

Enraf Nonius MACH3 diffractometer

Monochromator: graphite

*T* = 293 K

profiled ω/2θ scans

Absorption correction: ψ scan

North A.C.T., Phillips D.C. & Mathews F.S. (1968) Acta.

Cryst. A24, 351 Number of ψ scan sets used was 5 Theta

correction was applied. Averaged transmission function

was used. Fourier smoothing - Window value 5

*T*<sub>min</sub> = 0.786, *T*<sub>max</sub> = 0.842

4140 measured reflections

1607 independent reflections

1582 reflections with *I* > 2σ(*I*)

*R*<sub>int</sub> = 0.036

θ<sub>max</sub> = 26.5°

θ<sub>min</sub> = 3.6°

*h* = -20→19

*k* = -10→12

*l* = -14→10

3 standard reflections

every 99 reflections

intensity decay: 2%

#### Refinement

Refinement on *F*<sup>2</sup>

Least-squares matrix: full

*R*[*F*<sup>2</sup> > 2σ(*F*<sup>2</sup>)] = 0.041

*wR*(*F*<sup>2</sup>) = 0.117

*S* = 1.20

1607 reflections

141 parameters

8 restraints

Primary atom site location: structure-invariant direct

Secondary atom site location: difference Fourier map

Hydrogen site location: inferred from neighbouring sites

H atoms treated by a mixture of independent and constrained refinement

*w* = 1/[σ<sup>2</sup>(*F*<sub>o</sub><sup>2</sup>) + (0.0438*P*)<sup>2</sup> + 4.0866*P*] where *P* = (*F*<sub>o</sub><sup>2</sup> + 2*F*<sub>c</sub><sup>2</sup>)/3

(Δ/σ)<sub>max</sub> = 0.009

Δρ<sub>max</sub> = 0.45 e Å<sup>-3</sup>

Δρ<sub>min</sub> = -0.37 e Å<sup>-3</sup>

Extinction correction: none

methods

*Special details*

**Geometry.** All e.s.d.'s (except the e.s.d. in the dihedral angle between two l.s. planes) are estimated using the full covariance matrix. The cell e.s.d.'s are taken into account individually in the estimation of e.s.d.'s in distances, angles and torsion angles; correlations between e.s.d.'s in cell parameters are only used when they are defined by crystal symmetry. An approximate (isotropic) treatment of cell e.s.d.'s is used for estimating e.s.d.'s involving l.s. planes.

**Refinement.** Refinement of  $F^2$  against ALL reflections. The weighted  $R$ -factor  $wR$  and goodness of fit  $S$  are based on  $F^2$ , conventional  $R$ -factors  $R$  are based on  $F$ , with  $F$  set to zero for negative  $F^2$ . The threshold expression of  $F^2 > \sigma(F^2)$  is used only for calculating  $R$ -factors(gt) etc. and is not relevant to the choice of reflections for refinement.  $R$ -factors based on  $F^2$  are statistically about twice as large as those based on  $F$ , and  $R$ -factors based on ALL data will be even larger.

**Table S5** Fractional atomic coordinates and isotropic or equivalent isotropic displacement parameters ( $\text{\AA}^2$ )

|     | $x$          | $y$          | $z$          | $U_{\text{iso}}^*/U_{\text{eq}}$ | Occ.( $<1$ ) |
|-----|--------------|--------------|--------------|----------------------------------|--------------|
| C2  | 0.37150 (17) | 0.0135 (3)   | 0.7816 (2)   | 0.0274 (5)                       |              |
| C3  | 0.3238 (2)   | -0.0644 (3)  | 0.8303 (3)   | 0.0409 (7)                       |              |
| H3  | 0.3594       | -0.1156      | 0.9078       | 0.049*                           |              |
| C4  | 0.2247 (2)   | -0.0652 (3)  | 0.7640 (3)   | 0.0432 (7)                       |              |
| H4  | 0.1933       | -0.117       | 0.7972       | 0.052*                           |              |
| C5  | 0.17008 (19) | 0.0106 (3)   | 0.6472 (3)   | 0.0385 (6)                       |              |
| H5  | 0.1028       | 0.0092       | 0.6024       | 0.046*                           |              |
| C6  | 0.21662 (18) | 0.0863 (3)   | 0.5999 (3)   | 0.0307 (5)                       |              |
| H6  | 0.1814       | 0.1375       | 0.5223       | 0.037*                           |              |
| N1  | 0.31476 (14) | 0.0867 (2)   | 0.6668 (2)   | 0.0252 (4)                       |              |
| N2  | 0.5515 (14)  | -0.212 (2)   | 0.965 (2)    | 0.093 (6)                        | 0.5          |
| O1  | 0.49436 (14) | 0.3049 (2)   | 0.8555 (2)   | 0.0360 (5)                       |              |
| O2  | 0.36162 (12) | 0.16278 (19) | 0.62129 (16) | 0.0274 (4)                       |              |
| O1W | 0.5          | -0.4072 (4)  | 0.75         | 0.105 (2)                        |              |
| O3  | 0.46346 (13) | 0.0261 (2)   | 0.83392 (18) | 0.0338 (4)                       |              |
| O2W | 0.2684 (5)   | -0.2811 (9)  | 0.5549 (8)   | 0.081 (2)                        | 0.5          |
| O3W | 0.5640 (5)   | -0.2263 (7)  | 0.9561 (7)   | 0.0239 (10)                      | 0.5          |
| V1  | 0.5          | 0.20040 (6)  | 0.75         | 0.0227 (2)                       |              |
| H11 | 0.5          | -0.499 (2)   | 0.75         | 0.027*                           |              |
| H12 | 0.544 (3)    | -0.343 (5)   | 0.773 (6)    | 0.027*                           | 0.5          |
| H13 | 0.310 (4)    | -0.353 (4)   | 0.593 (6)    | 0.027*                           | 0.5          |
| H14 | 0.225 (5)    | -0.226 (7)   | 0.489 (6)    | 0.027*                           | 0.5          |
| H21 | 0.532 (5)    | -0.137 (5)   | 0.918 (6)    | 0.027*                           | 0.5          |
| H22 | 0.552 (5)    | -0.239 (7)   | 1.035 (4)    | 0.027*                           | 0.5          |
| H23 | 0.547 (3)    | -0.275 (3)   | 0.916 (3)    | 0.027*                           |              |
| H24 | 0.6040 (19)  | -0.219 (4)   | 0.969 (4)    | 0.027*                           |              |

**Table S6** Atomic displacement parameters ( $\text{Å}^2$ )

|     | $U^{11}$   | $U^{22}$   | $U^{33}$   | $U^{12}$    | $U^{13}$   | $U^{23}$    |
|-----|------------|------------|------------|-------------|------------|-------------|
| C2  | 0.0246(11) | 0.0306(12) | 0.0246(12) | -0.0020(9)  | 0.0111(10) | 0.0036(9)   |
| C3  | 0.0381(15) | 0.0456(16) | 0.0383(15) | -0.0049(13) | 0.0195(13) | 0.0123(13)  |
| C4  | 0.0369(15) | 0.0482(17) | 0.0520(17) | -0.0096(13) | 0.0283(14) | 0.0063(14)  |
| C5  | 0.0252(13) | 0.0423(15) | 0.0484(16) | -0.0053(11) | 0.0195(12) | -0.0008(13) |
| C6  | 0.0214(11) | 0.0340(13) | 0.0308(13) | -0.0006(10) | 0.0094(10) | 0.0008(10)  |
| N1  | 0.0213(9)  | 0.0291(10) | 0.0247(10) | -0.0028(8)  | 0.0116(8)  | 0.0010(8)   |
| N2  | 0.100(10)  | 0.107(11)  | 0.102(10)  | 0.038(7)    | 0.074(8)   | -0.005(7)   |
| O1  | 0.0294(9)  | 0.0426(11) | 0.0372(10) | 0.0027(8)   | 0.0182(8)  | -0.0085(8)  |
| O2  | 0.0215(8)  | 0.0369(10) | 0.0240(8)  | -0.0016(7)  | 0.0119(7)  | 0.0078(7)   |
| O1W | 0.204(7)   | 0.033(2)   | 0.089(3)   | 0           | 0.084(4)   | 0           |
| O3  | 0.0231(9)  | 0.0421(11) | 0.0312(9)  | 0.0001(8)   | 0.0106(7)  | 0.0114(8)   |
| O2W | 0.066(4)   | 0.099(6)   | 0.096(5)   | 0.007(3)    | 0.057(4)   | 0.006(4)    |
| O3W | 0.029(2)   | 0.026(2)   | 0.023(2)   | 0.016(2)    | 0.017(2)   | 0.0018(17)  |
| V1  | 0.0188(3)  | 0.0256(3)  | 0.0250(3)  | 0           | 0.0122(2)  | 0           |

**Table S7** Geometric parameters ( $\text{\AA}$ ,  $^\circ$ )

|             |             |                                       |             |
|-------------|-------------|---------------------------------------|-------------|
| C2—O3       | 1.285 (3)   | O1—V1                                 | 1.6412 (19) |
| C2—N1       | 1.373 (3)   | O2—V1                                 | 1.9773 (17) |
| C2—C3       | 1.397 (4)   | O1W—H11                               | 0.881 (19)  |
| C3—C4       | 1.370 (4)   | O1W—H12                               | 0.87 (2)    |
| C3—H3       | 0.93        | O3—V1                                 | 2.1817 (19) |
| C4—C5       | 1.397 (4)   | O2W—O2W <sup>i</sup>                  | 1.262 (16)  |
| C4—H4       | 0.93        | O2W—H13                               | 0.91 (2)    |
| C5—C6       | 1.359 (4)   | O2W—H14                               | 0.90 (2)    |
| C5—H5       | 0.93        | O3W—H21                               | 0.98 (4)    |
| C6—N1       | 1.356 (3)   | O3W—H22                               | 1.06 (4)    |
| C6—H6       | 0.93        | O3W—H23                               | 0.62 (3)    |
| N1—O2       | 1.350 (3)   | O3W—H24                               | 0.59 (2)    |
| N2—H21      | 0.86 (2)    | V1—O1 <sup>ii</sup>                   | 1.6411 (19) |
| N2—H22      | 0.86 (2)    | V1—O2 <sup>ii</sup>                   | 1.9773 (17) |
| N2—H23      | 0.816 (19)  | V1—O3 <sup>ii</sup>                   | 2.1817 (19) |
| N2—H24      | 0.833 (19)  |                                       |             |
| O3—C2—N1    | 116.0 (2)   | C2—O3—V1                              | 111.86 (15) |
| O3—C2—C3    | 126.9 (2)   | O2W <sup>i</sup> —O2W—H13             | 135 (4)     |
| N1—C2—C3    | 117.1 (2)   | O2W <sup>i</sup> —O2W—H14             | 25 (5)      |
| C4—C3—C2    | 120.0 (3)   | H13—O2W—H14                           | 158 (7)     |
| C4—C3—H3    | 120         | H21—O3W—H22                           | 102 (5)     |
| C2—C3—H3    | 120         | H21—O3W—H23                           | 113 (5)     |
| C3—C4—C5    | 120.8 (3)   | H22—O3W—H23                           | 112 (5)     |
| C3—C4—H4    | 119.6       | H21—O3W—H24                           | 106 (5)     |
| C5—C4—H4    | 119.6       | H22—O3W—H24                           | 118 (5)     |
| C6—C5—C4    | 119.1 (2)   | H23—O3W—H24                           | 106 (5)     |
| C6—C5—H5    | 120.4       | O1 <sup>ii</sup> —V1—O1               | 104.42 (15) |
| C4—C5—H5    | 120.4       | O1 <sup>ii</sup> —V1—O2 <sup>ii</sup> | 102.08 (9)  |
| N1—C6—C5    | 119.5 (2)   | O1—V1—O2 <sup>ii</sup>                | 90.88 (8)   |
| N1—C6—H6    | 120.3       | O1 <sup>ii</sup> —V1—O2               | 90.88 (8)   |
| C5—C6—H6    | 120.3       | O1—V1—O2                              | 102.08 (9)  |
| O2—N1—C6    | 119.9 (2)   | O2 <sup>ii</sup> —V1—O2               | 158.89 (11) |
| O2—N1—C2    | 116.56 (19) | O1 <sup>ii</sup> —V1—O3               | 162.20 (9)  |
| C6—N1—C2    | 123.5 (2)   | O1—V1—O3                              | 89.48 (9)   |
| H21—N2—H22  | 134 (7)     | O2 <sup>ii</sup> —V1—O3               | 88.55 (7)   |
| H21—N2—H23  | 107 (6)     | O2—V1—O3                              | 75.13 (7)   |
| H22—N2—H23  | 114 (7)     | O1 <sup>ii</sup> —V1—O3 <sup>ii</sup> | 89.48 (9)   |
| H21—N2—H24  | 97 (6)      | O1—V1—O3 <sup>ii</sup>                | 162.20 (9)  |
| H22—N2—H24  | 115 (6)     | O2 <sup>ii</sup> —V1—O3 <sup>ii</sup> | 75.13 (7)   |
| H23—N2—H24  | 72 (4)      | O2—V1—O3 <sup>ii</sup>                | 88.55 (7)   |
| N1—O2—V1    | 115.95 (13) | O3—V1—O3 <sup>ii</sup>                | 79.40 (11)  |
| H11—O1W—H12 | 135 (4)     |                                       |             |

Symmetry codes: (i)  $-x+1/2, -y-1/2, -z+1$ ; (ii)  $-x+1, y, -z+3/2$ .

**Table S8** *Hydrogen-bond geometry* (Å, °)

| D—H···A                     | D—H        | H···A      | D···A      | D—H···A   |
|-----------------------------|------------|------------|------------|-----------|
| O1W—H11···O1 <sup>i</sup>   | 0.881 (19) | 2.293 (17) | 3.061 (4)  | 145.6 (3) |
| O1W—H11···O1 <sup>ii</sup>  | 0.881 (19) | 2.293 (17) | 3.061 (4)  | 145.6 (3) |
| O1W—H12···N2                | 0.87 (2)   | 2.54 (6)   | 2.917 (19) | 107 (5)   |
| O1W—H12···O3W               | 0.87 (2)   | 2.30 (6)   | 2.723 (8)  | 110 (5)   |
| N2—H21···O3                 | 0.86 (2)   | 1.88 (4)   | 2.72 (2)   | 163 (7)   |
| N2—H22···O1 <sup>iii</sup>  | 0.86 (2)   | 1.91 (4)   | 2.73 (2)   | 160 (6)   |
| N2—H23···O1W                | 0.816 (19) | 2.12 (2)   | 2.917 (19) | 164 (4)   |
| N2—H24···O2W <sup>iv</sup>  | 0.833 (19) | 2.30 (3)   | 3.09 (2)   | 159 (4)   |
| N2—H24···O2W <sup>v</sup>   | 0.833 (19) | 2.30 (2)   | 3.115 (17) | 167 (4)   |
| O2W—H13···N2 <sup>v</sup>   | 0.91 (2)   | 3.00 (6)   | 3.115 (17) | 89 (4)    |
| O2W—H14···N2 <sup>vi</sup>  | 0.90 (2)   | 2.74 (8)   | 3.09 (2)   | 105 (6)   |
| O2W—H14···O3W <sup>vi</sup> | 0.90 (2)   | 2.47 (8)   | 2.877 (10) | 108 (6)   |
| O2W—H13···O3W <sup>v</sup>  | 0.91 (2)   | 2.69 (6)   | 2.829 (11) | 89 (4)    |
| O3W—H23···O1W               | 0.62 (3)   | 2.12 (2)   | 2.723 (8)  | 164 (4)   |
| O3W—H24···O2W <sup>v</sup>  | 0.59 (2)   | 2.30 (2)   | 2.829 (11) | 151 (5)   |

Symmetry codes: (i)  $-x+1, y-1, -z+3/2$ ; (ii)  $x, y-1, z$ ; (iii)  $-x+1, -y, -z+2$ ; (iv)  $x+1/2, -y-1/2, z+1/2$ ; (v)  $-x+1, y, -z+3/2$ ; (vi)  $x-1/2, -y-1/2, z-1/2$ .

## References

- Altomare, A., Cascarano, G., Giacovazzo, C. & Guagliardi, A. (1993). *J. Appl. Cryst.* 26, 343-350.
- Altomare, A., Burla, M. C., Camalli, M., Cascarano, G. L., Giacovazzo, C., Guagliardi, A., Moliterni, A. G. G., Polidori, G. & Spagna, R. (1999). *J. Appl. Cryst.* 32, 115-119.
- Blessing, R. H. (1995). *Acta Cryst.*, A51, 33-38.
- Blessing, R. H. (1987). *Cryst. Rev.* 1, 3-58.
- Blessing, R. H. (1989). *J. Appl. Cryst.* 22, 396-397.
- Cremer, D. & Pople, J. A. (1975). *J. Am. Chem. Soc.* 97, 1354-1358.
- Enraf-Nonius (1996). MACH3/PC Software. Enraf-Nonius, Delft, The Netherlands.
- Farrugia, L. J. (1997). ORTEP-3 for Windows, *J. Appl. Cryst.* 30, 565.
- Farrugia, L. J. (1999). WinGX, *J. Appl. Cryst.* 32, 837-838.
- Flack, H. D. (1983). *Acta Cryst.* A39, 876-881.
- Johnson, C. K. (1965). ORTEP. Report ORNL-3794. Oak Ridge National Laboratory, Tennessee, USA.
- Lehman, M. S. & Larsen, F. K. (1974). *Acta Cryst.* A30, 580
- LePage, Y. (1987). *J. Appl. Cryst.* 20, 264-269.
- North, A. C. T., Phillips, D. C. & Mathews, F. S. (1968). *Acta Cryst.* A24, 351-359
- Orpen, A. G., Brammer, L., Allen, F. H., Kennard, O., Watson, D. G. & Taylor, R. (1992). *International Tables for Crystallography, Volume C.*
- Sheldrick, G. M. (1993). SHELXL93. Program for crystal structure refinement. University of Göttingen, Germany.
- Sheldrick, G. M. (1997). SHELXL97. Program for crystal structure refinement. University of Göttingen, Germany.
- Sheldrick, G. M. (1997). SHELXS97. Program for Crystal Structure solution. University of Göttingen, Germany.
- Spek, A. L. (1990). *Acta Cryst.* A46, C34
- Streltsov, V. A. & Zavodnik, V. E. (1989). *Sov. Phys. Crystallogr.* 34, 824-828
- Streltsov, V. A. & Zavodnik, V. E. (1990). *Sov. Phys. Crystallogr.* 35, 281.
- Walker, N. & Stuart, D. (1983). *Acta Cryst.*, A39, 158 - 166.
- Wilson, A. J. C. (1992). *International Tables for Crystallography, Volume C*, Kluwer Academic Publishers, Dordrecht, The Netherlands.
